1

2

3

4

**Emergence of an Australian-like *pstS*-null vancomycin resistant *Enterococcus***

5

***faecium* clone in Scotland**

6

7

8 Kimon Lemonidis<sup>1,#a\*</sup>, Talal S. Salih<sup>1,#b</sup>, Stephanie J. Dancer<sup>2,3</sup>, Iain S. Hunter<sup>1</sup>, and Nicholas

9

P. Tucker<sup>1</sup>

10

11 <sup>1</sup> Strathclyde Institute of Pharmacy and Biomedical Sciences, University of Strathclyde, Glasgow G4 0RE, UK

12 <sup>2</sup> Department of Microbiology, Hairmyres Hospital, NHS Lanarkshire, G75 8RG, UK

13 <sup>3</sup> School of Applied Sciences, Edinburgh Napier University, Edinburgh, EH11 4BN, UK

14 <sup>#a</sup> Current address: Institute of Molecular, Cell and Systems Biology, University of Glasgow, Glasgow, G12 8QQ,

15 UK

16 <sup>#b</sup> Current address: College of Science, University of Mosul, Mosul, Iraq

17

18 \*Corresponding author

19 E-mail: [kimon.lemonidis@gmail.com](mailto:kimon.lemonidis@gmail.com)

20

21

22

## 23 Abstract

24 Multi-locus sequencing typing (MLST) is widely used to monitor the phylogeny of microbial  
25 outbreaks. However, several strains of vancomycin-resistant *Enterococcus faecium* (VREfm)  
26 with a missing MLST locus (*pstS*) have recently emerged in Australia, with a few cases also  
27 reported in England. Here, we identified similarly distinct strains circulating in two closely  
28 located hospitals in Scotland. Whole genome sequencing of five VREfm strains isolated from  
29 these hospitals identified four *pstS*-null strains across both hospitals, while the fifth was of a  
30 multi-locus sequence type (ST) 262, which is the first documented in the UK. All five Scottish  
31 isolates had an insertion in the *tetM* gene, which is associated with increased susceptibility  
32 to tetracyclines, providing no other tetracycline-resistant gene is present. Such an insertion,  
33 which encompasses a *dfirG* gene and two currently uncharacterised genes, was additionally  
34 identified in all tested *VanA*-type *pstS*-null VREfm strains (5 English and 18 Australian).  
35 Phylogenetic comparison with other VREfm genomes indicates that the four *pstS*-null  
36 Scottish isolates sequenced in this study are more closely related to *pstS*-null strains from  
37 Australia rather than the English *pstS*-null isolates. Given how rapidly such *pstS*-null strains  
38 have expanded in Australia, the emergence of this clone in Scotland raises concerns for a  
39 potential outbreak.

40

## 41 Introduction

42 Vancomycin-resistant *Enterococcus* (VRE) was first identified about three decades ago and  
43 has now become a major nosocomial pathogen. It typically infects immunocompromised  
44 patients and can cause endocarditis, bloodstream, urinary tract, and skin and skin structure  
45 infections [1]. VRE infections are generally more serious than those caused by vancomycin-  
46 susceptible enterococci, and are associated with higher mortality rates [2]. Among all VRE  
47 species, vancomycin-resistant *Enterococcus faecium* (VREfm) is responsible for the majority

48 of hospital infections. VREfm has been recently listed as a high priority pathogen for  
49 research and development of new antibiotics by the World Health Organisation [3]. Various  
50 measures have been implemented to monitor the spread of VREfm infections, including  
51 multi-locus sequence typing (MLST); this relies on characterising the allelic profile of seven  
52 “house-keeping” genes, located in the *E. faecium* chromosome [4]. Although useful, this  
53 MLST scheme is of limited resolution to accurately capture the clonal type of isolated *E.*  
54 *faecium* strains [5–7]. Furthermore, VREfm isolates lacking the *pstS* MLST-gene locus have  
55 recently emerged in both England [7] and Australia [8].

56 Here, we have used whole genome sequencing to identify four VREfm isolates from two  
57 Scottish hospitals, which lack the *pstS* locus, and another Scottish VREfm isolate with a  
58 MLST profile that, to the best of our knowledge, has not been previously reported in the UK.  
59 Additionally, we provide information regarding their resistance profiles and epidemiology.

60

## 61 **Materials and Methods**

62 VRE strains were isolated from 5 patients in 2 Scottish hospitals, between January to  
63 October 2017; these patients developed complications following either biliary or colonic  
64 surgery, and had been treated with various combinations of penicillin, amoxicillin,  
65 flucloxacillin, Tazocin™, gentamicin, metronidazole and vancomycin during their hospital  
66 stay. The VRE strains were cultured on horse blood agar with single colonies transferred to  
67 Mueller Hinton broth (Oxoid) liquid. These were subsequently placed on Mueller Hinton agar;  
68 single colony cultures of these were subsequently used for DNA isolation. Genomic DNA  
69 was extracted using an Isolate II genomic DNA kit (Bioline), using the manufacturer’s  
70 instructions for difficult to lyse Gram-positive bacteria. DNA libraries were then prepared  
71 using the NEBNext® Fast DNA Fragmentation and Library Prep Set for Ion Torrent™ (New  
72 England Biolabs): briefly, 1 µg of plasmid DNA was fragmented, and Ion Xpress barcode

73 adapters (Life Technologies) were ligated to the DNA fragments; after clean-up using  
74 Agencourt AMPure XP beads (Beckman Coulter), 400 bp target fragments were isolated  
75 following 18 min electrophoresis on E-gel® SizeSelect™ agarose gels (Life Technologies);  
76 these were subsequently amplified by PCR and, following another clean-up with Agencourt®  
77 AMPure® XP beads, the quality of the resulting DNA libraries was assessed on a 2100  
78 Bioanalyzer® (Agilent Technologies), using high sensitivity DNA chips (Agilent  
79 Technologies). Template positive Ion Sphere™ particles (ISPs) for semiconductor  
80 sequencing were prepared using the Ion Touch 2 System (Life Technologies). Enriched ISPs  
81 were loaded into ion v2 BC 316™ chips (2 genomes per chip) and sequenced on an Ion  
82 PGM™ system (Life Technologies). Low quality reads (quality score threshold: 0.05) were  
83 trimmed using CLC genomics Workbench (Qiagen, version 9.5.2), and resulting reads were  
84 assembled using SPAdes (St. Petersburg genome assembler, version 3.9). Contigs having  
85 less than 1000 bp sequences were discarded. The remaining contigs were reordered on  
86 Mauve (version 20150226) using the *E. faecium* Aus0004 genome [9] as reference, and  
87 resulting genome sequences were submitted to GenBank under the assessments  
88 PJZU00000000 (VREF001), PJZT00000000 (VREF002), PJZS00000000 (VREF003),  
89 PJZR00000000 (VREF004) and PJZQ00000000 (VREF005). Antibiotic resistant genes were  
90 identified as perfect, strict or loose matches against resistant genes of the comprehensive  
91 antibiotic resistance database (CARD) [10]. Sequence reads of *pstS*-null genomes from  
92 England and Australia were obtained from European Nucleotide Archive, and reads were  
93 assembled using CLC genomics Workbench; contigs having less than 200 bp were  
94 discarded. *In silico* MLST analysis was performed using the PubMLST website  
95 (<http://pubmlst.org/>) [11]. Alignments of genomes were done using the REALPHY  
96 (Reference sequence Alignment based Phylogeny builder) online tool (version 1.12) [12],  
97 with *E. faecium* Aus0004 [9], Aus0085 [13] as references. Minimum inhibitory concentrations  
98 (MICs) for vancomycin, streptomycin, spectinomycin, tetracycline, oxytetracycline,  
99 doxycycline, minocycline and rifampicin were calculated using the microdilution method in

100 cation adjusted Mueller-Hinton broth media (BD Biosciences), whereas MICs for all other  
101 antibiotics were obtained using VITEK 2 (bioMerieux).

102

## 103 Results

104 All Scottish VRE strains sequenced (VREF001-5) had 2.9-3.0 Mb genomes with 37.6-37.7%  
105 GC content (Table 1). Analysis of average nucleotide identity and Tetra Correlation Search  
106 (TCS) against database genome sequences, using JSpeciesWS (version 3.0.12) [14],  
107 showed that all five VRE isolates were *E. faecium*; VREF001, VREF002, VREF004 and  
108 VREF005 were highly related with over 99.9% identity among aligned (>97%) sequences,  
109 whereas VREF003 displayed around 16% unique sequences compared with the other 4  
110 genomes. *In silico* MLST analysis of VREF001-5 genomes identified VREF003 as sequence  
111 type (ST) 262, which has not been previously reported in the United Kingdom. The other 4  
112 genomes had exact matches for 6 MLST alleles (*atpA-9*, *ddl-1*, *gdh-1*, *purK-1*, *gyd-12*, *adk-*  
113 *1*), but no match for *pstS*; such MLST profile has now been assigned as ST1424 in the  
114 *Enterococcus faecium* MLST database (<https://pubmlst.org/efaecium/>). However, despite  
115 the missing *pstS* in these four genomes, all VREFm strains sequenced in this study did have  
116 a *pstS* homologue within a *pst* operon (also referred to as *pstS2*), which is thought to be the  
117 actual *pstS* housekeeping gene in *E. faecium* [7,8].

118

119 **Table 1.** Features of assembled sequences of the five isolates.

| Isolate ID     | VREF001      | VREF002      | VREF003      | VREF004      | VREF005      |
|----------------|--------------|--------------|--------------|--------------|--------------|
| Accession      | SAMN08196781 | SAMN08196782 | SAMN08196783 | SAMN08196784 | SAMN08196785 |
| Size (bp)      | 2,987,950    | 2,990,107    | 2,913,585    | 2,999,027    | 2,976,182    |
| GC Content (%) | 37.6         | 37.6         | 37.7         | 37.6         | 37.6         |
| N50            | 39407        | 36771        | 32649        | 43809        | 38134        |
| L50            | 23           | 22           | 28           | 21           | 22           |

|                   |        |        |        |        |        |
|-------------------|--------|--------|--------|--------|--------|
| Contigs           | 185    | 185    | 188    | 184    | 190    |
| Depth of coverage | 194.91 | 131.85 | 170.17 | 182.45 | 218.18 |

120

121 We then searched for antibiotic resistance genes with perfect or strict matches to reference  
122 genes of the comprehensive antibiotic resistance database (CARD), but also considering  
123 loose matches with exceptional low e-value ( $<10^{-100}$ ) and/or very high identity ( $>66\%$ ) to the  
124 reference gene. Analysis of the gene profiles of these five isolates identified the multi-  
125 aminoglycoside resistance gene *aac(6')-li*, in all 5 strains, and *aac(6')-aph(2'')*, in all but  
126 VREF004; all 5 isolates had at least 1 macrolide-lincosamide-streptogramin resistance gene  
127 (*ermB*), a *pbp5* variant (designated *pbp5-R*) conferring resistance to beta-lactams [15], for  
128 which no reference gene exists in CARD, and the vancomycin-teicoplanin resistance gene,  
129 *vanA*. With the exception of VREF003, all strains had the spectinomycin resistance gene  
130 *ant(9)-Ia*. Lastly, VREF003 was the only strain with a tetracycline transporter gene (*tetL*)  
131 (Table 2). It is notable that all isolates had 2 loose matches for the tetracycline resistance  
132 gene *tetM*. By further examining the region where these *tetM*-like sequences are located,  
133 we found that the 5 genomes had a *Tn5801*-like transposon (full-length or fragment)  
134 containing a sequence similar to *Staphylococcus aureus* Mu50 *tetM* gene [16], but with a  
135 3,229 bp insertion. The trimethoprim-resistant gene *dfrG* and two more genes with unknown  
136 function were located within this insertion. A similar insertion has been reported previously in  
137 some ST17 and ST18 *E. faecium* strains [16] which is thought to result in defective  
138 protection against tetracyclines [17]. Lastly, all strains had a homologue of the *E. faecalis*  
139 *IsaA* gene which confers resistance to quinipristin-dalfopristin. However, the product of this  
140 gene (known as EatA), unlike the  $>99\%$  identical EatA<sub>v</sub> product found in some *E. faecium*  
141 strains, has a threonine at position 450, which is associated with increased susceptibility  
142 towards quinupristin-dalfopristin [18,19].

143

144 **Table 2.** MIC values (mg/L) of selected antibiotics against the 5 Scottish VREfm isolates.

145 Susceptibility to a given antibiotic is indicated in bold. ND: MIC value not determined.  
 146 Resistant genes identified which correspond to strict or perfect matches against antibiotic  
 147 resistance genes of the comprehensive antibiotic resistance database (CARD) are shown.  
 148 Additionally, some loose matches (underlined) to CARD reference genes, which either had >  
 149 99% identity with reference CARD gene (*tetL*), or had zero e-value (*rpoB2*), or were the sole  
 150 genes that could explain differences in antimicrobial susceptibility among the 5 isolates  
 151 (*ant(9)-la*, *marA* and *mtrR*), are shown. The variant of a full-length penicillin-binding protein 5  
 152 gene conferring resistance to penicillins (*pbp5-R*), for which no reference gene in CARD  
 153 exists, was found in all genomes. Numbers at top right of resistant genes correspond to the  
 154 sequenced strains (last digit of isolate ID) carrying these genes.

|                                                         |                               | VREF00<br>1 | VREF00<br>2 | VREF00<br>3 | VREF00<br>4 | VREF00<br>5 | Resistance genes                                                                                                                                                                                                  |
|---------------------------------------------------------|-------------------------------|-------------|-------------|-------------|-------------|-------------|-------------------------------------------------------------------------------------------------------------------------------------------------------------------------------------------------------------------|
| <b>Beta-lactams</b>                                     | Amoxicillin                   | > 32        | > 32        | > 32        | > 32        | > 32        | <i>pbp5-R</i> <sup>1-5</sup>                                                                                                                                                                                      |
|                                                         | Co-Amoxiclav                  | > 8         | > 8         | > 8         | > 8         | > 8         | <i>pbp5-R</i> <sup>1-5</sup>                                                                                                                                                                                      |
| <b>Glycopeptides</b>                                    | Vancomycin                    | 64          | 512         | > 512       | 512         | 128         | <i>vanA</i> <sup>1-5</sup> , <i>vanHA</i> <sup>1-3,5</sup> , <i>vanRA</i> <sup>1-5</sup> , <i>vanSA</i> <sup>1-4</sup> ,<br><i>vanXA</i> <sup>1-5</sup> , <i>vanYA</i> <sup>2,4</sup> , <i>vanZA</i> <sup>3</sup> |
|                                                         | Teicoplanin                   | > 32        | > 32        | > 32        | > 32        | 4           | <i>vanA</i> <sup>1-5</sup> , <i>vanHA</i> <sup>1-3,5</sup> , <i>vanRA</i> <sup>1-5</sup> , <i>vanSA</i> <sup>1-4</sup> ,<br><i>vanXA</i> <sup>1-5</sup> , <i>vanYA</i> <sup>2,4</sup> , <i>vanZA</i> <sup>3</sup> |
| <b>Fluoroquinolones</b>                                 | Ciprofloxacin                 | > 4         | > 4         | > 4         | > 4         | ND          | <i>efmA</i> <sup>1-5</sup>                                                                                                                                                                                        |
| <b>Aminoglycosides</b>                                  | Gentamicin                    | > 128       | > 128       | > 128       | > 128       | > 128       | <i>aac(6')-aph(2'')</i> <sup>1-3,5</sup>                                                                                                                                                                          |
|                                                         | Kanamycin                     | > 128       | > 128       | > 128       | > 128       | > 128       | <i>aac(6')-aph(2'')</i> <sup>1-3,5</sup> , <i>aph(3')-IIIa</i> <sup>1-2,4,5</sup> ,<br><i>aac(6')-li</i> <sup>1-5</sup>                                                                                           |
|                                                         | Streptomycin                  | 32          | 32          | 32          | 32          | 32          | None                                                                                                                                                                                                              |
|                                                         | Spectinomycin                 | 512         | 512         | 32          | > 512       | 512         | <i>ant(9)-la</i> <sup>1-2,4-5</sup>                                                                                                                                                                               |
| <b>Tetracyclines</b>                                    | Tetracycline                  | ≤ 0.25      | ≤ 0.25      | > 128       | ≤ 0.25      | ≤ 0.25      | <i>tetL</i> <sup>3</sup>                                                                                                                                                                                          |
|                                                         | Oxytetracycline               | 1           | ≤ 0.25      | > 128       | 0.5         | ≤ 0.25      | <i>tetL</i> <sup>3</sup>                                                                                                                                                                                          |
|                                                         | Doxycycline                   | ≤ 0.25      | ≤ 0.25      | 16          | ≤ 0.25      | ≤ 0.25      | <i>tetL</i> <sup>3</sup>                                                                                                                                                                                          |
|                                                         | Minocycline                   | ≤ 0.13      | ≤ 0.13      | 16          | ≤ 0.13      | ≤ 0.13      | <i>tetL</i> <sup>3</sup>                                                                                                                                                                                          |
|                                                         | Tigecycline                   | ≤ 0.13      | ≤ 0.13      | ≤ 0.13      | ≤ 0.13      | ≤ 0.13      | None                                                                                                                                                                                                              |
| <b>Macrolides,<br/>Lincosamides,<br/>Streptogramins</b> | Clarithromycin                | > 4         | > 4         | > 4         | > 4         | > 4         | <i>ermA</i> <sup>1-2,4-5</sup> , <i>ermB</i> <sup>1-5</sup>                                                                                                                                                       |
|                                                         | Quinupristin-<br>Dalfopristin | 0.5         | 0.5         | 0.5         | 1           | 0.5         | None                                                                                                                                                                                                              |
| <b>Others</b>                                           | Chloramphenicol               | 8           | 8           | ≤ 4         | 8           | 8           | None                                                                                                                                                                                                              |
|                                                         | Linezolid                     | 2           | 2           | 2           | 2           | 2           | None                                                                                                                                                                                                              |
|                                                         | Nitrofurantoin                | 128         | 256         | 128         | 256         | 256         | Unknown                                                                                                                                                                                                           |
|                                                         | Trimethoprim                  | > 16        | > 16        | > 16        | > 16        | > 16        | <i>dfrG</i> <sup>1-5</sup>                                                                                                                                                                                        |
|                                                         | Rifampicin                    | 16          | 16          | 1           | 16          | 16          | <i>rpoB2</i> <sup>1-5</sup> , <i>marA</i> <sup>1-2,4-5</sup> , <i>mtrR</i> <sup>1-2,4-5</sup>                                                                                                                     |

155

156 All strains exhibited high level resistance to vancomycin; 4/5 had high level resistance to  
157 teicoplanin, associated with the presence of *vanSA* (absent from VREF005, which displayed  
158 low level resistance) and 4/5 had high level resistance to spectinomycin (apart from  
159 VREF003 which displayed low level resistance). The strains had low level resistance to  
160 streptomycin, as well as resistance to a variety of other drugs. The low level resistance to  
161 streptomycin and spectinomycin, in the absence of any gene coding for resistance to those  
162 antibiotics, is due to decreased uptake of these drugs by *E. faecium* [20]. All isolates were  
163 susceptible to linezolid, chloramphenicol, tigecycline and Synercid™ (quinupristin-  
164 dalfopristin). VREF003 was the only isolate found to be resistant to tetracycline, doxycycline,  
165 oxytetracycline and minocycline, but unlike the other four isolates, it was susceptible to  
166 rifampicin (Table 2). Since all five isolates had an identical *rpoB2* variant (assumed to exert  
167 some level of rifampicin-resistance), the decreased resistance of VREF003 towards  
168 rifampicin, compared to the other 4 strains, may be due to the lack of any *mtrR* and *marA*  
169 homologues in the VREF003 genome. On the other hand, loose matches of these were  
170 present in the other four isolates, and such genes have been shown to confer resistance to  
171 multiple drugs in other bacteria, including rifampicin [21,22]. Alternatively, VREF001-2 and  
172 VREF004-5 may contain an *mtrR*-independent mechanism of reduced permeability for  
173 rifampicin compared with VREF003 [23]. Antibiotic susceptibility tests indicated that all five  
174 isolates are classified as multi-drug resistant enterococci, according to standardised  
175 international terminology [24].

176 We then performed a phylogenetic comparison of VREF001-5 genomes with other known  
177 VREfm genomes reported to have a missing *pstS* locus; these included: 14 (out of 66  
178 reported) Australian strains isolated from 9 different hospitals between 2014 and 2015 [8], 5  
179 Australian strains (out of 202 reported within 6 local health districts) isolated from 2 different  
180 local health districts (LHD-1 and LHD-2) in New South Wales during 2016 [25], and all 5  
181 English *pstS*-null *E. faecium* strains isolated from a single hospital (Kathy Raven, personal



182 communication) in 2005 [7]. In our phylogenetic analysis we also included: 5 hospital-  
183 associated isolates of different MLST sequence type each, 3 isolates (BM4538, UAA1025  
184 and E2883) previously reported to have an insertion in the *tetM*-locus [16] and the first  
185 complete *E. faecium* genome, Aus0004 [9].

186 This analysis indicated that Scottish *pstS*-null isolates are most closely related to Australian  
187 *pstS*-null isolates (Fig. 1A; subclade 3-1), and particularly to certain ST1424 clones isolated  
188 from New South Wales (hospital 3 and Local Health District 1). Due to the existence of long  
189 branches within subclade 3-1 (Fig. 1A), the phylogeny of that subclade was further refined  
190 by analysis of genomes belonging only to this subclade [12] (Fig. 1B); most Australian  
191 ST1421 clones and the sole ST1422 were found to be closely related to the ST1424  
192 subclade; however, few Australian ST1421 strains (SVH-244, DMG1500788 and  
193 DMG1500808) and one ST1424 (SVH-278) were more phylogenetically distinct, whereas the  
194 sole ST1423 clone (*VanB* type DMG1500761) was found to diverge the most among all  
195 *pstS*-null strains (Fig. 1A-C). English *pstS*-null isolates, which are all ST1477, all cluster  
196 together (Fig. 1A; subclade 2-2) and are distinct from Australian and Scottish *pstS*-null  
197 strains; nevertheless, all *pstS*-null clones appear to be related to ST17 clones (Fig. 1A;  
198 subclade 3-2 and Fig. 1C), which suggests that the former may have derived from ST17  
199 strains. Most of the Australian *pstS*-null genomes we analysed were ST1421 (Fig. 1C), in  
200 agreement with recent data showing that ST1421 is the most common and widespread  
201 *pstS*-null VRE strain in Australia, accounting for more than 70% of the cases [25,26]. Since  
202 both Australian [8] and Scottish (this study) VREfm *pstS*-null strains were found in different  
203 hospitals (Fig. 1C), it is likely that such clones have spread in the community. Our  
204 phylogenetic analysis further supports an intercontinental ST1424 clone spread between  
205 hospitals of New South Wales and Scotland (Fig. 1). On the other hand, all English VREfm  
206 strains with missing *pstS* locus [7] cluster together and are likely to have spread within the  
207 hospital that they were isolated from. VREF003 is more phylogenetically related to ST18 *E.*  
208 *faecium* isolates (Fig. 1A), in agreement with a previous study showing a phylogenetic

209 relationship between ST262 and ST18 *E. faecium* strains [27]. *VanA* type VREfm strains  
210 lacking the *pstS* locus (4/4 Scottish, 18/18 Australian and 5/5 English) were found to also  
211 contain a *Tn5801*-like transposon with an insertion in the *tetM* locus (Fig. 1C). This  
212 genotype, previously documented in the MLST-typeable Aus0004, BM4538, E2883 and  
213 UAA1025 [16] included in this analysis, was further observed in VREF003, ERR374934 and  
214 ERR374968. The sole *vanB* type VREfm with missing *pstS* reported, though, had an intact  
215 *tetM* gene sequence. Collectively, it appears that the *tetM* insertion in VREfm is associated  
216 with *VanA* type strains missing *pstS* (STs: 1421, 1422, 1424 and 1477), as well as with STs:  
217 17, 18, 80 and 262 (Fig. 1C).

218

219 **Figure 1. A.** Phylogenetic tree of selected *E. faecium* genomes, constructed using the  
220 REALPHY (Reference sequence Alignment based Phylogeny builder) online tool, with  
221 Aus0004 and Aus0085 used as reference genomes. *pstS*-null genomes are present in  
222 subclades 2-2 (English isolates) and 3-1 (Australian and Scottish isolates), **B.** The phylogeny  
223 of strains clustering in subclade 3-1 (A) was further refined using REALPHY with Aus0085  
224 and ERR374968 as references. **C.** The MLST sequence type (ST) and alleles, country of  
225 origin, *van* genotype, hospital and year of isolation are given for each sequenced genome. \*  
226 Only the Local Health District (LHD) is known for Australian strains isolated in New South  
227 Wales hospitals during 2016; hospitals 3 and 9 are also in New South Wales jurisdiction, but  
228 their LHD is not known. Information is given on whether an insertion encompassing *dfrG* and  
229 two uncharacterised genes was found within *tetM* in these genomes. N/A: not applicable (no  
230 *tetM* sequences found). \*\* Although no such insertion was identified in Aus0085, there was a  
231 frameshift mutation within its *tetM* gene. *pstS*-null genomes of same ST are highlighted with  
232 the same colour.

233

## 234 Discussion

235 MLST analysis is inferior to whole genome sequence analysis for outbreak investigations of  
236 VREfm [7], due to the high rate of recombination events occurring within the *E. faecium*  
237 chromosome that cannot be captured adequately by MLST analysis [27,28]. Furthermore,  
238 the emergence of non-typeable VREfm strains poses an extra obstacle in implementing the  
239 MLST scheme for VREfm phylogenetic analysis. Non-typeable VREfm strains have recently  
240 emerged and have been shown to be very rare in the UK: in a study encompassing whole  
241 genome sequencing of nearly 500 *E. faecium* healthcare-associated isolates from 2001-  
242 2011 in the UK and Ireland, there were only 5 cases of *pstS*-null VRE strains, all of which  
243 were isolated from a single English hospital, between 2004 and 2005 [7]. The emergence of  
244 such strains was even more recent in Australia: the first two strains were isolated in 2013,  
245 but numbers increased rapidly to a total of 89 cases, by the end of 2015 [8,29,30] and to  
246 about 300 cases, by the end of 2016 [25,30,31].

247 Here, we report four additional non-typeable VREfm strains isolated in 2017, which are the  
248 first identified in Scotland. Their striking genomic similarity, combined with the fact that one  
249 was isolated from a different hospital, indicates that these, although deriving from a single  
250 strain type, are not necessarily hospital-acquired, but may be health-care associated, or  
251 spread within the community. Although transmission may have occurred through the  
252 frequent transfer of equipment, specimens, staff and patients between these two hospitals  
253 (located in the same health board just 14 miles apart), evidence suggests that VRE strains  
254 are also transmitted outside hospitals, such as in long term care facilities [6]. Additionally,  
255 VRE clones can disperse outside health-care facilities, since strains can be carried in  
256 patients for long periods, ranging from a few months to a few years following their discharge  
257 from hospital [32,33]. For the above reasons VRE infections may spread over long periods  
258 and across long distances. Indeed, our phylogenetic analysis is indicative of an inter-  
259 continental spread between Australia and Scotland: the closest phylogenetic relationships  
260 were identified among Australian and Scottish ST1424 clones; such 6-locus sequence type  
261 has been identified in 28.7% (58/202) of the recently sequenced *pstS*-null VREfm strains

262 from New South Wales, Australia [25]. In addition, the spread of such strains in all health  
263 districts of New South Wales is also suggestive of inter-hospital transmission for this VREfm  
264 clone [25]. But even within the same hospital, VRE transmission routes can be prolonged  
265 and complex with closely related VRE strains re-appearing in the same ward after several  
266 months, or transmitted to patients located in different wards [34]. Indeed, we also observed  
267 re-appearance of a *pstS*-null strain (isolate VREF005) in the same hospital, seven months  
268 after discharge of the last carrier patient.

269 With the exception of one vancomycin-sensitive and one *vanB* type strain, all other (69)  
270 previously sequenced *pstS*-null *E. faecium* strains have been found to be *vanA* type [7,8],  
271 and consistent with these studies, the newly sequenced Scottish VREfm strains with the  
272 missing *pstS* locus were also *vanA* type. In fact, the vast majority (84.2%) of all *VanA E.*  
273 *faecium* 2016 isolates from New South Wales (Australia) sequenced, have been identified as  
274 *pstS*-null strains [25]; hence *pstS*-null VREfm appears to be a very successful *VanA* clone.  
275 We further identified that loss of *pstS* in *VanA* type VREfm is strongly associated with an  
276 insertion in a *tetM* gene (27/27 cases tested). Such insertion was absent only in the sole  
277 *vanB* type *E. faecium* strain of the *pstS*-null collection. As the 18 Australian *VanA* type *pstS*-  
278 null strains analysed here, were chosen to represent all 9 hospitals in the 3 health  
279 jurisdictions (or different local health district of the same jurisdiction) and phylogenetically  
280 distinct clades of the Australian *pstS*-null collection [8,25], it is highly likely that most (if not  
281 all) of the reported *VanA*-type *pstS*-null Australian strains excluded from our analysis (about  
282 280 isolates) would contain a *Tn5801*-like transposon with an insertion in the *tetM* locus. The  
283 reason that these two features (missing *pstS* and *tetM* insertion) were co-selected in  
284 numerous VREs is currently unknown and deserves some further investigation. The *tetM*  
285 insertion leads to apparent inactivation of the resulting gene product towards tetracyclines,  
286 as can be inferred from Aus0004 [17], VREF001-2 and VREF004-5 (this study) susceptibility  
287 tests against tetracycline, doxycycline and minocycline. All sequenced isolates were  
288 resistant to trimethoprim, and the cause of such resistance is most likely the *dfpG* gene

289 inserted into the *tetM* locus. None of the isolates sequenced had a tigecycline, Synercid, or  
290 linezolid resistant gene, and as a consequence they were all susceptible to these 3 drugs.  
291 Thus these antibiotics, which are frequently used for management of multi-drug-resistant  
292 enterococcal infections [1,35], may still be the favourable option for combating VREfm  
293 strains with a missing *pstS* locus.

294 The emergence of *pstS*-null VREfm strains in Scotland raises concerns for a potential  
295 outbreak: these strains were found to be highly similar to Australian *pstS*-null strains (this  
296 study), while the latter have very rapidly expanded to become the leading strain in Australia  
297 (2016), causing infections in numerous hospitals and in different health jurisdictions  
298 [8,25,26]. Furthermore, the missing *pstS* locus of such strains renders the - limited in  
299 resolution - MLST analysis even less suitable for VREfm outbreak investigations. Hence, our  
300 study, like previous ones [7,8,25], highlights the need for whole genome sequencing  
301 approaches in monitoring VREfm epidemiology.

302

## 303 **Acknowledgements**

304 This work was supported by the Scottish Chief Scientist Office grant TCS/16/24 to NPT, SJD  
305 and ISH. We are very thankful to Gavin Paterson and Alison MacFadyen for reading the  
306 manuscript and for their useful comments.

307

## 308 **References**

- 309 1. O'Driscoll T, Crank CW. Vancomycin-resistant enterococcal infections: epidemiology,  
310 clinical manifestations, and optimal management. Infect Drug Resist. Dove Press;  
311 2015;8: 217–30. doi:10.2147/IDR.S54125

- 312 2. Orsi GB, Ciorba V. Vancomycin resistant enterococci healthcare associated  
313 infections. *Ann Ig*. 2013;25: 485–492. doi:10.7416/ai.2013.1948
- 314 3. WHO. Prioritization of pathogens to guide discovery, research and development of  
315 new antibiotics for drug resistant bacterial infections, including tuberculosis [Internet].  
316 Essential medicines and health products. 2017. doi:WHO reference number:  
317 WHO/EMP/IAU/2017.12
- 318 4. Homan WL, Tribe D, Poznanski S, Li M, Hogg G, Spalburg E, et al. Multilocus  
319 sequence typing scheme for *Enterococcus faecium*. *J Clin Microbiol*. 2002;40: 1963–  
320 71.
- 321 5. de Been M, Pinholt M, Top J, Bletz S, Mellmann A, van Schaik W, et al. Core  
322 Genome Multilocus Sequence Typing Scheme for High- Resolution Typing of  
323 *Enterococcus faecium*. *J Clin Microbiol*. American Society for Microbiology; 2015;53:  
324 3788–97. doi:10.1128/JCM.01946-15
- 325 6. Brodrick HJ, Raven KE, Harrison EM, Blane B, Reuter S, Török ME, et al. Whole-  
326 genome sequencing reveals transmission of vancomycin-resistant *Enterococcus*  
327 *faecium* in a healthcare network. *Genome Med*. 2016; doi:10.1186/s13073-015-0259-  
328 7
- 329 7. Raven KE, Reuter S, Reynolds R, Brodrick HJ, Russell JE, Török ME, et al. A decade  
330 of genomic history for healthcare-associated *Enterococcus faecium* in the United  
331 Kingdom and Ireland. *Genome Res*. 2016; doi:10.1101/gr.204024.116
- 332 8. Carter GP, Buultjens AH, Ballard SA, Baines SL, Tomita T, Strachan J, et al.  
333 Emergence of endemic MLST non-typeable vancomycin-resistant *Enterococcus*  
334 *faecium*. *J Antimicrob Chemother*. 2016;71: 3367–3371. doi:10.1093/jac/dkw314
- 335 9. Lam MMC, Seemann T, Bulach DM, Gladman SL, Chen H, Haring V, et al.  
336 Comparative Analysis of the First Complete *Enterococcus faecium* Genome. *J*

- 337 Bacteriol. 2012;194: 2334–2341. doi:10.1128/JB.00259-12
- 338 10. McArthur AG, Waglechner N, Nizam F, Yan A, Azad MA, Baylay AJ, et al. The  
339 Comprehensive Antibiotic Resistance Database. *Antimicrob Agents Chemother.*  
340 2013;57: 3348–3357. doi:10.1128/AAC.00419-13
- 341 11. Jolley KA, Maiden MC. BIGSdb: Scalable analysis of bacterial genome variation at the  
342 population level. *BMC Bioinformatics*. BioMed Central; 2010;11: 595.  
343 doi:10.1186/1471-2105-11-595
- 344 12. Bertels F, Silander OK, Pachkov M, Rainey PB, Van Nimwegen E. Automated  
345 reconstruction of whole-genome phylogenies from short-sequence reads. *Mol Biol*  
346 *Evol.* Oxford University Press, Oxford; 2014;31: 1077–1088.  
347 doi:10.1093/molbev/msu088
- 348 13. Lam MMC, Seemann T, Tobias NJ, Chen H, Haring V, Moore RJ, et al. Comparative  
349 analysis of the complete genome of an epidemic hospital sequence type 203 clone of  
350 vancomycin-resistant *Enterococcus faecium*. *BMC Genomics*. 2013;  
351 doi:10.1186/1471-2164-14-595
- 352 14. Richter M, Rosselló-Móra R, Oliver Glöckner F, Peplies J. JSpeciesWS: a web server  
353 for prokaryotic species circumscription based on pairwise genome comparison.  
354 *Bioinformatics*. Oxford University Press; 2016;32: 929–931.  
355 doi:10.1093/bioinformatics/btv681
- 356 15. Montealegre MC, Roh JH, Rae M, Davlieva MG, Singh K V, Shamooy Y, et al.  
357 Differential Penicillin-Binding Protein 5 (PBP5) Levels in the *Enterococcus faecium*  
358 Clades with Different Levels of Ampicillin Resistance. *Antimicrob Agents Chemother.*  
359 *American Society for Microbiology*; 2017;61: e02034-16. doi:10.1128/AAC.02034-16
- 360 16. León-Sampedro R, Novais C, Peixe L, Baquero F, Coque TM. Diversity and evolution  
361 of the Tn5801-tet(M)-like integrative and conjugative elements among *Enterococcus*,

- 362           streptococcus, and Staphylococcus. *Antimicrob Agents Chemother.* 2016;  
363           doi:10.1128/AAC.01864-15
- 364   17.   Cattoir V, Isnard C, Cosquer T, Odhiambo A, Bucquet F, Guérin F, et al. Genomic  
365           analysis of reduced susceptibility to Tigecycline in *Enterococcus faecium*. *Antimicrob*  
366           *Agents Chemother.* 2015; doi:10.1128/AAC.04174-14
- 367   18.   Singh K V., Weinstock GM, Murray BE. An *Enterococcus faecalis* ABC homologue  
368           (Lsa) is required for the resistance of this species to clindamycin and quinupristin-  
369           dalfopristin. *Antimicrob Agents Chemother.* 2002; doi:10.1128/AAC.46.6.1845-  
370           1850.2002
- 371   19.   Isnard C, Malbruny B, Leclercq R, Cattoira V. Genetic basis for in vitro and in vivo  
372           resistance to lincosamides, streptogramins a, and pleuromutilins (LSAP Phenotype) in  
373           *Enterococcus faecium*. *Antimicrob Agents Chemother.* 2013; doi:10.1128/AAC.01030-  
374           13
- 375   20.   Arias CA, Murray BE. The rise of the *Enterococcus*: Beyond vancomycin resistance.  
376           *Nature Reviews Microbiology.* 2012. doi:10.1038/nrmicro2761
- 377   21.   Cohen SP, McMurry LM, Levy SB. marA locus causes decreased expression of  
378           OmpF porin in multiple-antibiotic-resistant (Mar) mutants of *Escherichia coli*. *J*  
379           *Bacteriol.* 1988; doi:10.1128/jb.170.12.5416-5422.1988
- 380   22.   Spratt BG, Balthazar JT, Hagman KE, Pan W, Judd RC, Shafer WM. Resistance of  
381           *Neisseria gonorrhoeae* to antimicrobial hydrophobic agents is modulated by the  
382           mtrRCDE efflux system. *Microbiology. Microbiology Society*; 1995;141: 611–622.  
383           doi:10.1099/13500872-141-3-611
- 384   23.   Abadi FJ, Carter PE, Cash P, Pennington TH. Rifampin resistance in *Neisseria*  
385           meningitidis due to alterations in membrane permeability. *Antimicrob Agents*  
386           *Chemother.* 1996;40: 646–51.



- 387 24. Magiorakos A, Srinivasan A, Carey RB, Carmeli Y, Falagas ME, Giske CG, et al.  
388 Multidrug-resistant, extensively drug-resistant and pandrug-resistant Bacteria: an  
389 International Expert Proposal for Interim Standard Definitions for Acquired  
390 Resistance. *Microbiology*. 2011;18: 268–281. doi:10.1111/j.1469-0691.2011.03570.x
- 391 25. van Hal SJ, Beukers AG, Timms VJ, Ellem JA, Taylor P, Maley MW, et al. Relentless  
392 spread and adaptation of non-typeable vanA vancomycin-resistant *Enterococcus*  
393 *faecium*: a genome-wide investigation. *J Antimicrob Chemother*. 2018; 1487–1491.  
394 doi:10.1093/jac/dky074
- 395 26. Coombs G, Daley D, on behalf of The Australian Group on Antimicrobial Resistance.  
396 Australian Enterococcal Sepsis Outcome Program (AESOP). 2016 Final Rep. 2017;  
397 1–41. Available: [http://www.agargroup.org/files/AESOP 2016 Final Report 2017.pdf](http://www.agargroup.org/files/AESOP%202016%20Final%20Report%202017.pdf)
- 398 27. Bowden R, Ansari MA, Jensen SO, Ip CLC, Espedido BA, van Hal SJ, et al.  
399 Evolutionary dynamics of *Enterococcus faecium* reveals complex genomic  
400 relationships between isolates with independent emergence of vancomycin  
401 resistance. *Microb Genomics*. 2016; doi:10.1099/mgen.0.000048
- 402 28. Howden BP, Holt KE, Lam MMC, Seemann T, Ballard S, Coombs GW, et al. Genomic  
403 insights to control the emergence of vancomycin-resistant enterococci. *MBio*.  
404 American Society for Microbiology; 2013;4: e00412-13. doi:10.1128/mBio.00412-13
- 405 29. Lee RS, Gonçalves da Silva A, Baines SL, Strachan J, Ballard S, Carter GP, et al.  
406 The changing landscape of vancomycin-resistant *Enterococcus faecium* in Australia:  
407 a population-level genomic study. *J Antimicrob Chemother*. Oxford University Press;  
408 2018;73: 3268–3278. doi:10.1093/jac/dky331
- 409 30. Leong KWC, Cooley LA, Anderson TL, Gautam SS, McEwan B, Wells A, et al.  
410 Emergence of Vancomycin-Resistant *Enterococcus faecium* at an Australian Hospital:  
411 A Whole Genome Sequencing Analysis. *Sci Rep*. 2018;8: 1–11. doi:10.1038/s41598-

- 412           018-24614-6
- 413   31.   Leong KWC, Cooley LA, O'Toole RF. Draft Genome Sequence of New Vancomycin-  
414           Resistant *Enterococcus faecium* Sequence Type 1421. *Genome Announc.* 2018;6.  
415           doi:10.1128/genomeA.00438-18
- 416   32.   Sohn KM, Peck KR, Joo E-J, Ha YE, Kang C-I, Chung DR, et al. Duration of  
417           colonization and risk factors for prolonged carriage of vancomycin-resistant  
418           enterococci after discharge from the hospital. *Int J Infect Dis.* 2013;17: e240–e246.  
419           doi:10.1016/j.ijid.2012.09.019
- 420   33.   Karki S, Land G, Aitchison S, Kennon J, Johnson PDR, Ballard SA, et al. Long-term  
421           carriage of vancomycin-resistant enterococci in patients discharged from hospitals: a  
422           12-year retrospective cohort study. *J Clin Microbiol.* 2013;51: 3374–9.  
423           doi:10.1128/JCM.01501-13
- 424   34.   Raven KE, Gouliouris T, Brodrick H, Coll F, Brown NM, Reynolds R, et al. Complex  
425           Routes of Nosocomial Vancomycin-Resistant *Enterococcus faecium* Transmission  
426           Revealed by Genome Sequencing. *Clin Infect Dis.* 2017;64: 886–893.  
427           doi:10.1093/cid/ciw872
- 428   35.   Arias CA, Contreras GA, Murray BE. Management of Multi-Drug Resistant  
429           Enterococcal Infections. *Clin Microbiol Infect.* 2010;16: 555–62. doi:10.1111/j.1198-  
430           743X.2010.03214.x
- 431

A.

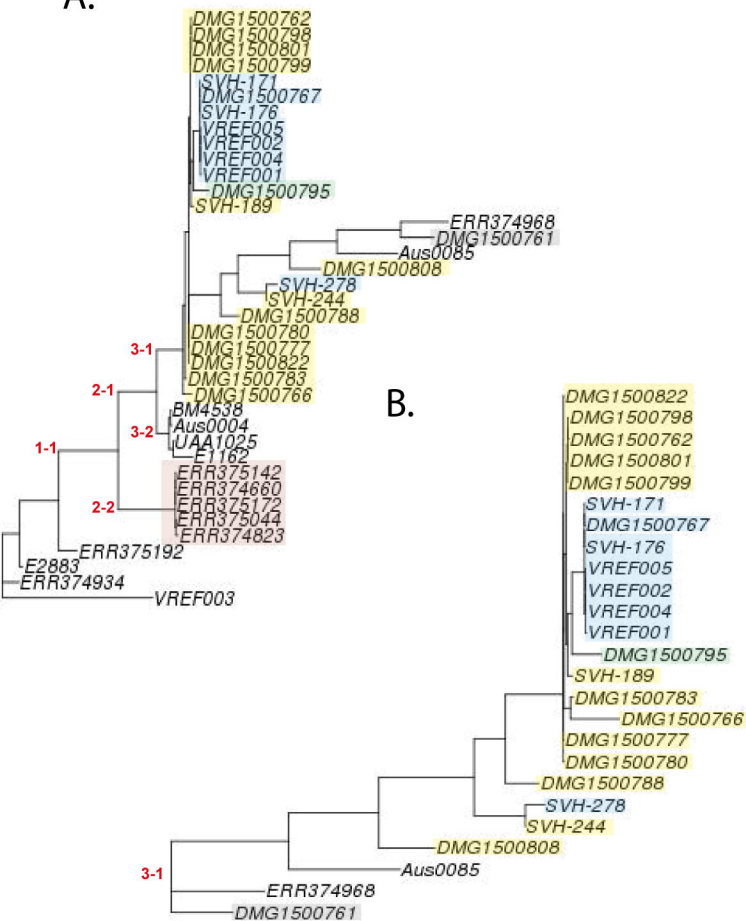

B.

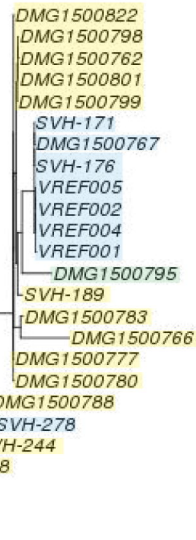

C.

| Isolate ID | ST   | MLST alleles |     |     |      |     |      |     | Origin      | Hospital | <i>tetM</i><br>insertion | <i>van</i><br>genotype | Year |
|------------|------|--------------|-----|-----|------|-----|------|-----|-------------|----------|--------------------------|------------------------|------|
|            |      | atpA         | ddl | gdh | purK | gyd | pstS | adk |             |          |                          |                        |      |
| Aus0004    | 17   | 1            | 1   | 1   | 1    | 1   | 1    | 1   | Australia   | Unknown  | YES                      | van B                  | 1998 |
| Aus0085    | 203  | 15           | 1   | 1   | 1    | 1   | 20   | 1   | Australia   | Unknown  | NO**                     | van B                  | 2009 |
| BM4538     | 17   | 1            | 1   | 1   | 1    | 1   | 1    | 1   | Australia   | Unknown  | YES                      | van B                  | 2004 |
| DMG1500761 | 1423 | 4            | 1   | 1   | 1    | 1   | 0    | 1   | Australia   | Unknown  | NO                       | van B                  | 2014 |
| DMG1500762 | 1421 | 1            | 1   | 1   | 1    | 1   | 0    | 1   | Australia   | 3        | YES                      | van A                  | 2014 |
| DMG1500766 | 1421 | 1            | 1   | 1   | 1    | 1   | 0    | 1   | Australia   | 1        | YES                      | van A                  | 2015 |
| DMG1500767 | 1424 | 9            | 1   | 1   | 1    | 12  | 0    | 1   | Australia   | 3        | YES                      | van A                  | 2015 |
| DMG1500777 | 1421 | 1            | 1   | 1   | 1    | 1   | 0    | 1   | Australia   | 1        | YES                      | van A                  | 2015 |
| DMG1500780 | 1421 | 1            | 1   | 1   | 1    | 1   | 0    | 1   | Australia   | 5        | YES                      | van A                  | 2015 |
| DMG1500783 | 1421 | 1            | 1   | 1   | 1    | 1   | 0    | 1   | Australia   | 4        | YES                      | van A                  | 2015 |
| DMG1500788 | 1421 | 1            | 1   | 1   | 1    | 1   | 0    | 1   | Australia   | 6        | YES                      | van A                  | 2015 |
| DMG1500795 | 1422 | 1            | 1   | 1   | 1    | 12  | 0    | 1   | Australia   | 3        | YES                      | van A                  | 2015 |
| DMG1500798 | 1421 | 1            | 1   | 1   | 1    | 1   | 0    | 1   | Australia   | 3        | YES                      | van A                  | 2015 |
| DMG1500799 | 1421 | 1            | 1   | 1   | 1    | 1   | 0    | 1   | Australia   | 9        | YES                      | van A                  | 2014 |
| DMG1500801 | 1421 | 1            | 1   | 1   | 1    | 1   | 0    | 1   | Australia   | 8        | YES                      | van A                  | 2014 |
| DMG1500808 | 1421 | 1            | 1   | 1   | 1    | 1   | 0    | 1   | Australia   | 2        | YES                      | van A                  | 2015 |
| DMG1500822 | 1421 | 1            | 1   | 1   | 1    | 1   | 0    | 1   | Australia   | 7        | YES                      | van A                  | 2015 |
| E1162      | 17   | 1            | 1   | 1   | 1    | 1   | 1    | 1   | France      | Unknown  | NO                       | negative               | 1997 |
| E2883      | 18   | 7            | 1   | 1   | 1    | 5   | 1    | 1   | Netherlands | Unknown  | YES                      | negative               | 2002 |
| ERR374660  | 1477 | 7            | 2   | 1   | 1    | 1   | 0    | 1   | England     | X        | YES                      | van A                  | 2005 |
| ERR374823  | 1477 | 7            | 2   | 1   | 1    | 1   | 0    | 1   | England     | X        | YES                      | van A                  | 2005 |
| ERR374934  | 18   | 7            | 1   | 1   | 1    | 5   | 1    | 1   | UK          | Unknown  | YES                      | van A                  | 2009 |
| ERR374968  | 78   | 15           | 1   | 1   | 1    | 1   | 1    | 1   | UK          | Unknown  | N/A                      | van A                  | 2009 |
| ERR375044  | 1477 | 7            | 2   | 1   | 1    | 1   | 0    | 1   | England     | X        | YES                      | van A                  | 2005 |
| ERR375142  | 1477 | 7            | 2   | 1   | 1    | 1   | 0    | 1   | England     | X        | YES                      | van A                  | 2004 |
| ERR375172  | 1477 | 7            | 2   | 1   | 1    | 1   | 0    | 1   | England     | X        | YES                      | van A                  | 2004 |
| ERR375192  | 80   | 9            | 1   | 1   | 1    | 12  | 1    | 1   | UK          | Unknown  | YES                      | van A                  | 2011 |
| SVH-171    | 1424 | 9            | 1   | 1   | 1    | 12  | 0    | 1   | Australia   | LHD-1*   | YES                      | van A                  | 2016 |
| SVH-176    | 1424 | 9            | 1   | 1   | 1    | 12  | 0    | 1   | Australia   | LHD-1*   | YES                      | van A                  | 2016 |
| SVH-189    | 1421 | 1            | 1   | 1   | 1    | 1   | 0    | 1   | Australia   | LHD-1*   | YES                      | van A                  | 2016 |
| SVH-244    | 1421 | 1            | 1   | 1   | 1    | 1   | 0    | 1   | Australia   | LHD-5*   | YES                      | van A                  | 2016 |
| SVH-278    | 1424 | 9            | 1   | 1   | 1    | 12  | 0    | 1   | Australia   | LHD-5*   | YES                      | van A                  | 2016 |
| UAA1025    | 17   | 1            | 1   | 1   | 1    | 1   | 1    | 1   | France      | Unknown  | YES                      | van A                  | 1996 |
| VREF001    | 1424 | 9            | 1   | 1   | 1    | 12  | 0    | 1   | Scotland    | W        | YES                      | van A                  | 2017 |
| VREF002    | 1424 | 9            | 1   | 1   | 1    | 12  | 0    | 1   | Scotland    | H        | YES                      | van A                  | 2017 |
| VREF003    | 262  | 7            | 1   | 1   | 1    | 5   | 7    | 1   | Scotland    | H        | YES                      | van A                  | 2017 |
| VREF004    | 1424 | 9            | 1   | 1   | 1    | 12  | 0    | 1   | Scotland    | H        | YES                      | van A                  | 2017 |
| VREF005    | 1424 | 9            | 1   | 1   | 1    | 12  | 0    | 1   | Scotland    | H        | YES                      | van A                  | 2017 |
